# Supplementary material for: Identification of Human UDP-Glucuronosyltransferase Involved in Gypensapogenin C Glucuronidation and Species Differences
Source: MDPI journal article supplement (doi:10.3390/ijms24021454), 2023-01-11
Supplement: s1 [file s1]

# Supplementary Materials

## Identification of Human UDP-Glucuronosyltransferase Involved in Gypensapogenin C Glucuronidation and Species Differences

Juan Chen <sup>1</sup>, Lin Qin <sup>1,2</sup>, Xingdong Wu <sup>1,2</sup>, Daopeng Tan <sup>1,2</sup>, Yanliu Lu <sup>1,2</sup>, Yimei Du <sup>1,2</sup>, Di  
Wu <sup>1,2</sup>, Yuqi He <sup>1,2, \*</sup>

1    Guizhou Engineering Research Center of Industrial Key-technology for Dendrobium  
Nobile, Zunyi Medical University, Zunyi 563000, China

2    Joint International Research Laboratory of Ethnomedicine of Ministry of Education,  
Zunyi Medical University, Zunyi 563000, China

\* Corresponding author: Tel.: +86-17785211152

E-mail address: yqhe2016@zmu.edu.cn

Figure S1. Glucuronidation of Gypensapogenin C at different protein concentrations.

Figure S2. Glucuronidation of Gypensapogenin C at different incubation times.

Table S1. Correlation coefficients between protein concentration and Gypensapogenin C glucuronidation.

Table S2. Correlation coefficients between incubation time and Gypensapogenin C glucuronidation.

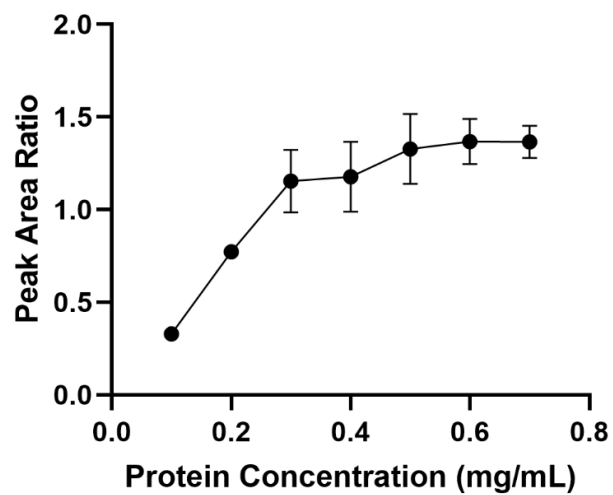

Figure S1. Glucuronidation of Gypensapogenin C at different protein concentrations.

Data are from three replicate experiments and results are expressed as mean  $\pm$  SD.

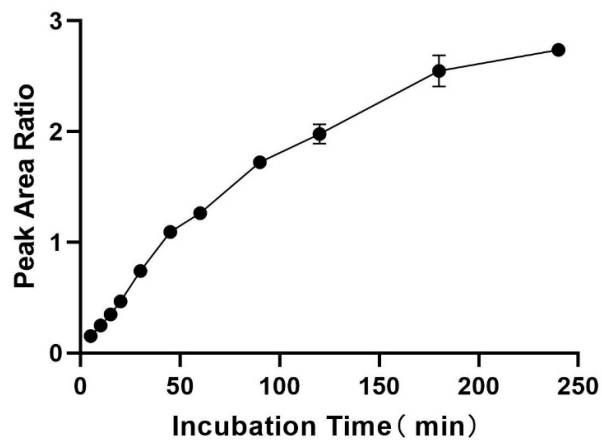

Figure S2. Glucuronidation of Gypensapogenin C at different incubation times. Data

are from three replicate experiments and results are expressed as mean  $\pm$  SD.

**Table S1.** Correlation coefficients between protein concentration and Gypensapogenin C glucuronidation.

| Protein concentration rang (mg/mL) | Correlation coefficient |
|------------------------------------|-------------------------|
| 0.1-0.3                            | 0.9982                  |
| 0.1-0.4                            | 0.8981                  |
| 0.1-0.5                            | 0.8831                  |
| 0.1-0.6                            | 0.8490                  |
| 0.1-0.7                            | 0.7955                  |

**Table S2.** Correlation coefficients between incubation time and Gypensapogenin C glucuronidation.

| Incubation time rang (min) | Correlation coefficient |
|----------------------------|-------------------------|
| 5-15                       | 0.9999                  |
| 5-20                       | 0.9979                  |
| 5-30                       | 0.9925                  |
| 5-45                       | 0.9973                  |
| 5-60                       | 0.9870                  |
| 5-90                       | 0.9831                  |
| 5-120                      | 0.9698                  |
| 5-180                      | 0.9597                  |
| 5-240                      | 0.9314                  |
